# Supplementary material
Source: Springer Nature journal article supplement (https://www.springermedizin.de/resource/supplementary/12943_2010_893_MOESM11_ESM.pdf/9551926)

**A**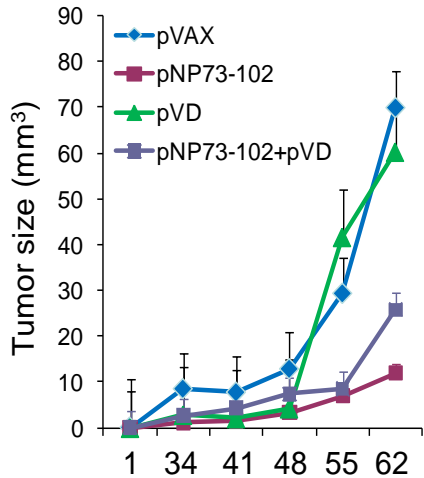**B**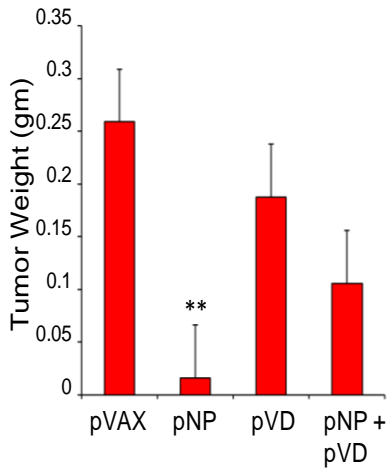**C**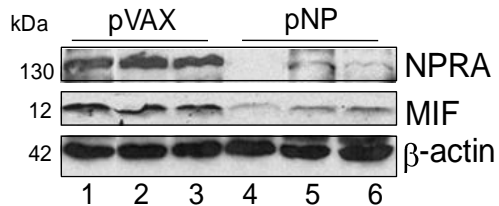

Supplement: MOESM11 [file 9551926]
